# Supplementary material for: Reduced BDNF expression in the auditory cortex contributed to neonatal pain-induced hearing impairment and dendritic pruning deficiency in mice
Source: PubMed Central journal article supplement — Reg Anesth Pain Med. 2022 Nov 16;48(2):85–92. doi: 10.1136/rapm-2022-103621 (PMC9811087; doi:10.1136/rapm-2022-103621), 2022-11-16
Supplement: rapm-2022-103621supp001.pdf [file rapm-2022-103621supp001.pdf]

## Supplementary data

### Reduced BDNF expression in the auditory cortex

contributed to neonatal pain-induced hearing impairment and dendritic pruning deficiency in mice

#### Running Head: Neonatal pain-induced hearing impairment

**Authors:** Nan-Qi Li<sup>1 †</sup>, Bing Chen<sup>1 5 †</sup>, Gao-Gan Jia<sup>2,3 †</sup>, Rui Xu<sup>1</sup>, Ying Xia<sup>1</sup>, Chui-jin Lai<sup>3</sup>, Gang li<sup>4</sup>, Wen-Xian Li <sup>‡</sup><sup>1</sup>, Yuan Han <sup>‡</sup><sup>1</sup>

#### Affiliations:

1. Department of Anesthesiology, Eye & ENT Hospital, Fudan University, Shanghai, 200031, China.
2. ENT Institute and Otorhinolaryngology Department of Shanghai Medical School, Eye & ENT Hospital of Fudan University, Shanghai, 200031, China.
3. NHC Key Laboratory of Hearing Medicine, 200031, Fudan University, Shanghai, 200031, China
4. Department of Ophthalmology, Eye & ENT Hospital of Fudan University, Shanghai, 200031, China.
5. Department of Anesthesiology, Zhongshan Hospital, Fudan University, Shanghai, 200032, China.

## Supplementary figures

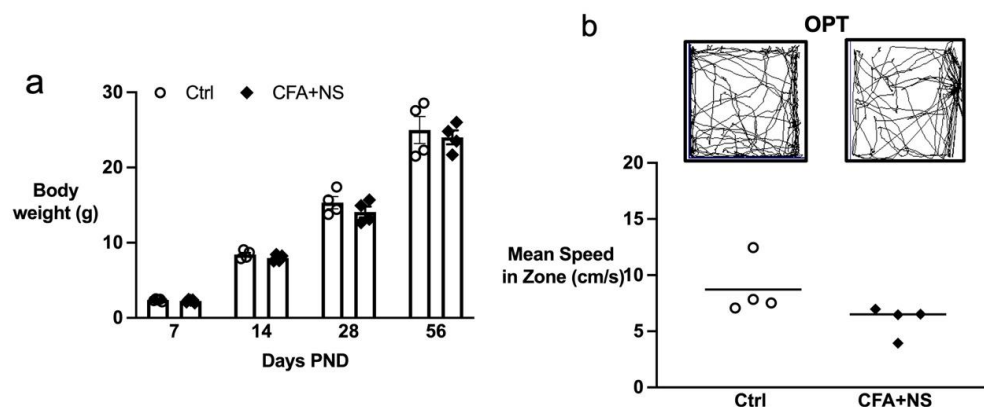

**SFig. 1 CFA administration did not affect the growth and motor function of mice.** (a) The weight changes among Ctrl, CFA + NS showed no significant difference at 7, 14, 28, and 56 days post-natal. (b) The open-field test showed that CFA + NS did not affect the motor function of mice.  $n=4$ , One-way ANOVA followed by Dunnett's post hoc test. Abbreviations: Ctrl, Control; CFA, Complete Freund Adjuvant injection; NS, Normal Saline; PND, Postnatal Day.

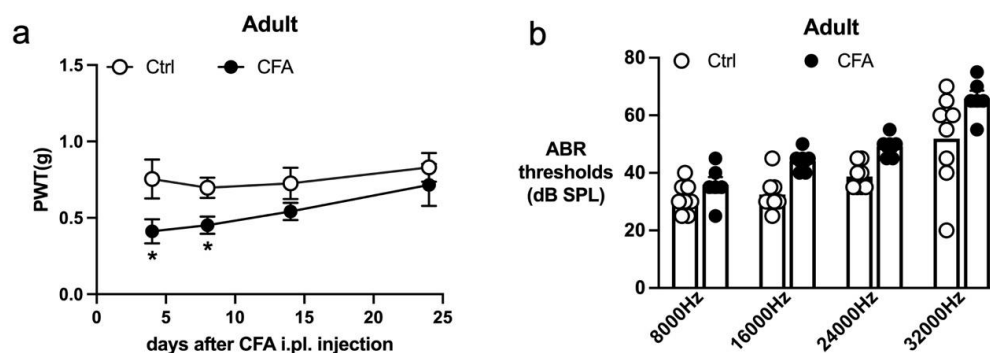

**SFig. 2 Intra-plantar CFA administration in adult mice did not impair hearing.**  $n=8$ ,  $*P < 0.05$ , compared to the Ctrl group. One-way ANOVA followed by Dunnett's post hoc test. Abbreviations: Ctrl, Control; CFA, Complete Freund Adjuvant injection

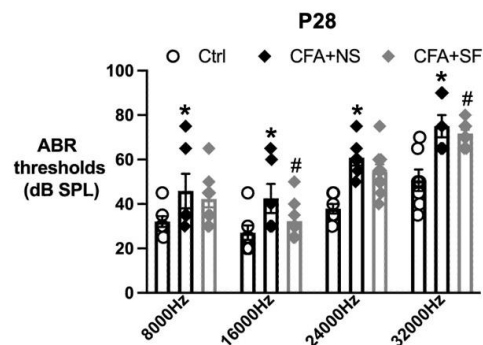

**SFig. 3 Sufentanil administration partially rescued the hearing loss of CFA-induced ABR thresholds increase at P28.**  $n=4\sim5$ ,  $*P < 0.05$  versus Ctrl group;  $\#P < 0.05$  versus CFA+NS group; One-way ANOVA followed by Dunnett's post hoc test. Abbreviations: Ctrl, Control; CFA, Complete Freund Adjuvant injection; SF, Sufentanil; ABR, Auditory Brainstem Response.

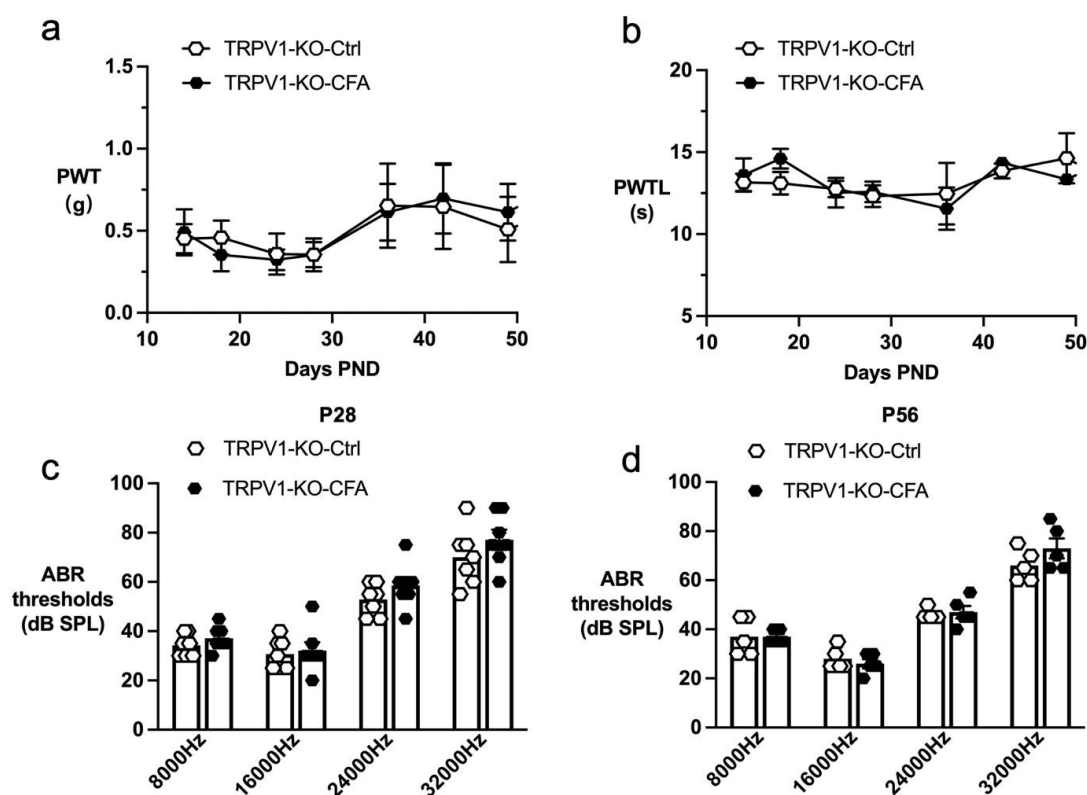

**SFig. 4 Intraplantar CFA injection at P7 did not induce persistent neonatal pain and hearing loss in adults in TRPV1-KO mice.** (a) Time course of the mechanical threshold changes in TRPV1-KO-Ctrl and TRPV1-KO-CFA mice. (b) Time course of the paw withdrawal

thermal latency (PWTl) in TRPV1-KO-Ctrl and TRPV1-KO-CFA mice. (c) ABR thresholds of TRPV1-KO-Ctrl and TRPV1-KO-CFA mice at 8000, 16000, 24000, and 32000 Hz frequencies at P28. (d) ABR thresholds of TRPV1-KO-Ctrl and TRPV1-KO-CFA mice at 8000, 16000, 24000, and 32000 Hz frequencies at P56.  $n = 5\sim 7$ . One-way ANOVA was followed by Dunnett's post hoc test. Abbreviations: Ctrl, Control; CFA, Complete Freund Adjuvant injection; KO, knockout, TRPV1, Transient receptor potential cation channel subfamily V member 1; PND, Post-natal day; ABR, Auditory Brainstem Response.

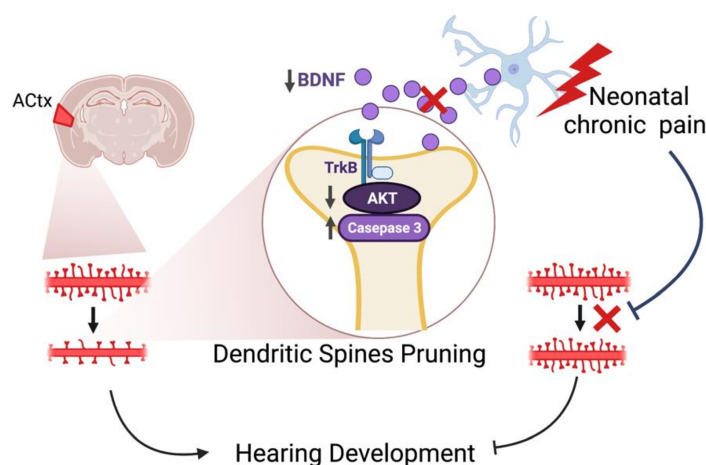

**SFig. 5 The mechanism underlying the neonatal persistent pain-induced hearing impairment.** AC, auditory cortex; BDNF, Brain-Derived Neurotrophic Factor; AKT, Protein kinase B; TrkB, Tropomyosin receptor kinase B. Created with BioRender.com
